# Supplementary material for: Novel molecular data for monogenean parasites of sparid fishes in the Mediterranean and a molecular phylogeny of the Microcotylidae Taschenberg, 1879
Source: PubMed Central journal article supplement (PMC9795350; doi:10.1016/j.crpvbd.2021.100069), 2021-12-24
Supplement: mmc1.pdf [file mmc1.pdf]

**Supplementary Table S1.** List of monogenean taxa included in the phylogenetic analyses with provenance data on their hosts, localities and GenBank accession numbers

| Monogenean species                                                      | Host species                                | Isolate                 | Locality                                                | GenBank ID<br><i>cox1</i>        | 28S rDNA | Reference                     |
|-------------------------------------------------------------------------|---------------------------------------------|-------------------------|---------------------------------------------------------|----------------------------------|----------|-------------------------------|
| <b>Family Microcotylidae Taschenberg, 1879</b>                          |                                             |                         |                                                         |                                  |          |                               |
| <b>Subfamily Anchoromicrocotylinae Bravo-Hollis, 1981</b>               |                                             |                         |                                                         |                                  |          |                               |
| <i>Cynoscionicola branchialis</i> <sup>a</sup>                          | <i>Umbrina xanti</i> Gill                   |                         | Mexico                                                  |                                  | AF382050 | Olson & Littlewood (2002)     |
| <b>Subfamily Atrasterinae Maillard &amp; Noisy, 1979</b>                |                                             |                         |                                                         |                                  |          |                               |
| <i>Atrispinum acarne</i> Maillard & Noisy, 1979                         | <i>Pagellus acarne</i> (Risso)              |                         | Off Sète, France (Western Mediterranean)                | AY009160                         | AF311702 | Jovelin & Justine (2001)      |
| <i>Bychowkicotyla mormyri</i> (Lorenz, 1878) Unnithan, 1971             | <i>Lithognathus mormyrus</i> (L.)           |                         | Off Sète, France (Western Mediterranean)                | AY009161                         | AF311713 | Jovelin & Justine (2001)      |
| <i>Sparicotyle chrysophrii</i> (van Beneden & Hesse, 1863) Mamaev, 1984 | <i>Sparus aurata</i> L.                     | L4                      | Adriatic Sea                                            | GQ240236                         |          | Mladineo et al. (2009)        |
| <b>Subfamily Metamicrocotylinae Yamaguti, 1963</b>                      |                                             |                         |                                                         |                                  |          |                               |
| <i>Intracotyle</i> sp. SC-2018                                          | na                                          |                         | na                                                      |                                  | MH700262 | Chou (unpublished)            |
| <i>Metamicrocotyla</i> sp. SC-2018                                      | na                                          |                         | na                                                      |                                  | MH700260 |                               |
| <b>Subfamily Microcotylinae Taschenberg, 1879</b>                       |                                             |                         |                                                         |                                  |          |                               |
| <i>Bivagina pagrosomi</i> (Murray, 1931) Dillon & Hargis, 1965          | <i>Sparus aurata</i> L.                     |                         | Coffs Harbor, NSW, Australia                            | Z83003                           | Z83002   | Littlewood et al. (1997)      |
| <i>Caballeraxine</i> sp. SC-2018                                        | na                                          |                         | na                                                      |                                  | AJ243678 | Littlewood et al. (1999)      |
| <i>Diplostamenides sciaenae</i> (Goto, 1894) Mamaev, 1986               | <i>Johnius belangerii</i> (Cuvier)          |                         | Versova Dock Landing Centre, Mumbai, India              |                                  | MH700261 | Chou (unpublished)            |
| <i>Diplostamenides</i> sp. SC-2018                                      | na                                          |                         | na                                                      |                                  | KU204208 | Verma & Agrawal (unpublished) |
| <i>Kahawaia truttae</i> (Dillon & Hargis, 1965) Lebedev, 1969           | <i>Arripis trutta</i> (Forster)             |                         | Off Bermagui, Australia                                 |                                  | FJ432589 | Su (unpublished)              |
| <i>Lutianicola</i> sp. SC-2018                                          | <i>Arripis truttaea</i> (Cuvier)            |                         | na                                                      |                                  | MH700263 | Chou (unpublished)            |
| <i>Microcotyle algeriensis</i> Ayadi, Gey, Justine & Tazerouti, 2016    | <i>Scorpaena notata</i> Rafinesque          | MO-01<br>MO-02<br>MO-03 | Off Bouharoun, Algeria (Western Mediterranean)          | KX926443<br>KX926444<br>KX926445 |          | Catalano et al. (2010)        |
| <i>Microcotyle archosargi</i> MacCallum, 1913                           | <i>Archosargus rhomboidalis</i> (L.)        | 81                      | Off Seybaplaya Coast, Campeche Bank, Mexico             |                                  | MG586867 | Mendoza-Franco et al. (2018)  |
| <i>Microcotyle arripis</i> Sandars, 1945                                | <i>Arripis georgiana</i> (Valenciennes)     | MC06                    | Off Australia                                           | LC472527                         | GU263830 | Catalano et al. (2010)        |
| <i>Microcotyle caudata</i> Goto, 1894                                   | <i>Sebastes innermis</i> Cuvier             | MC12                    | Seto Inland Sea, Japan                                  | LC472528                         |          | Ono et al. (2020)             |
|                                                                         | “ <i>Sebastes innermis</i> species complex” | MC18                    |                                                         | LC472529                         |          |                               |
|                                                                         |                                             | MC20                    |                                                         | LC472530                         |          |                               |
|                                                                         |                                             | MC24                    |                                                         | LC472531                         |          |                               |
| <i>Microcotyle erythrini</i> van Beneden & Hesse, 1863                  | <i>Pagellus erythrinus</i> (L.)             |                         | Off France (Western Mediterranean)                      | AY009159                         | AM157221 | Badets et al., (2011)         |
|                                                                         |                                             | MePe1                   | Off Guardamar del Segura, Spain (Western Mediterranean) |                                  | MN814848 | Jovelin & Justine (2001)      |
|                                                                         |                                             | MePe2                   |                                                         | MN816012                         |          | Víllora-Montero et al. (2020) |
|                                                                         |                                             |                         |                                                         | MN816013                         |          |                               |

|                                                                                                                  |                                                                                       |                                                    |                                                               |                                              |                                  |                                                 |
|------------------------------------------------------------------------------------------------------------------|---------------------------------------------------------------------------------------|----------------------------------------------------|---------------------------------------------------------------|----------------------------------------------|----------------------------------|-------------------------------------------------|
|                                                                                                                  | <i>Pagrus pagrus</i> (L.)                                                             | MePp1<br>MePp2<br>MePp3<br>MePp4                   |                                                               | MN816014<br>MN816015<br>MN816016<br>MN816017 | MN814849                         |                                                 |
| <i>Microcotyle isyebi</i> Bougerche, Gey, Justine & Tazerouti, 2019                                              | <i>Boops boops</i> (L.)                                                               | MO01                                               | Off Algeria (Western Mediterranean)                           | MK317922                                     |                                  | Bouguerche et al. (2019a)                       |
|                                                                                                                  |                                                                                       | MiBb1<br>MiBb2<br>MiBb3<br>MiBb4                   | Off Guardamar del Segura, Spain (Western Mediterranean)       | MN816018<br>MN816019<br>MN816020<br>MN816021 | MN814850                         | Villora-Montero et al. (2020)                   |
| <i>Microcotyle kasago</i> Ono, Matsumoto, Nitta & Kamio, 2020                                                    | <i>Sebastes marmoratus</i> (Cuvier)                                                   | MK02<br>MK01                                       | Seto Inland Sea, Japan                                        | LC472525<br>LC472526                         |                                  | Ono et al. (2020)                               |
| <i>Microcotyle sebastis</i> Goto, 1894                                                                           | <i>Sebastes</i> sp.                                                                   |                                                    | North Sea, off UK                                             |                                              | AF382051                         | Olson & Littlewood (2002)                       |
| <i>Microcotyle visa</i> Bougerche, Gey, Justine & Tazerouti, 2019                                                | <i>Sebastes schlegelii</i> Hilgendorf<br><i>Pagrus caeruleostictus</i> (Valenciennes) | PacoerM<br>O01<br>PacoerM<br>O02<br>PacoerM<br>O03 | Fish farm, South Korea<br>Off Algeria (Western Mediterranean) | DQ412044<br>MK275652                         |                                  | Park et al. (2007)<br>Bouguerche et al. (2019b) |
|                                                                                                                  |                                                                                       |                                                    |                                                               | MK275653<br>MK275654                         |                                  |                                                 |
| <i>Microcotyle whittingtoni</i> Villora-Montero, Pérez-del-Olmo, Georgieva, Raga & Montero, 2020                 | <i>Dentex dentex</i> (L.)                                                             | MwDd1<br>MwDd2                                     | Off Guardamar del Segura, Spain (Western Mediterranean)       | MN816010<br>MN816011                         | MN814847                         | Villora-Montero et al. (2020)                   |
| <i>Microcotyle</i> sp. 1 SC-2018                                                                                 | na                                                                                    |                                                    | na                                                            |                                              | MH700256                         | Chou (unpublished)                              |
| <i>Microcotyle</i> sp. 2 SC-2018                                                                                 | na                                                                                    | SC-2018                                            | na                                                            |                                              | MH700266                         |                                                 |
| <i>Microcotyle</i> sp. DG-2016                                                                                   | <i>Helicolenus dactylopterus</i> (Delaroche)                                          | MO-06<br>MO-04                                     | Off Bouharoun, Algeria (Western Mediterranean)                | KX926447<br>KX926446                         |                                  | Ayadi et al. (2017)                             |
| <i>Microcotyle</i> sp. <sup>b</sup>                                                                              | <i>Dentex dentex</i> (L.)                                                             | JWJ-2015                                           | Off Crete, Greece                                             |                                              | KT191025                         | Jun (2015)                                      |
| Microcotylidae gen. sp. M10                                                                                      | <i>Sebastes</i> sp.                                                                   |                                                    | Off UK                                                        |                                              | EF653385                         | Aiken et al. (2007)                             |
| <i>Microcotyloides incisus</i> (Linton, 1910) Fujii, 1944                                                        | <i>Rhomboplites aurorubens</i> (Cuvier)                                               | DNA-<br>2546                                       | Northern Gulf of Mexico, off USA                              |                                              | KU527427 <sup>f</sup>            | Claxton et al. (2017)                           |
|                                                                                                                  | <i>Lutjanus griseus</i> (L.)                                                          | 210; 211<br>210                                    | Campeche Bank, Mexico                                         |                                              | MG586862<br>MG586861<br>JN602095 | Mendoza-Franco et al. (2018)                    |
| <i>Omanicotyle heterospina</i> (Mamaev & Parukhin, 1974) Yoon, Al-Jufaili, Freeman, Bron, Paladini & Shinn, 2013 | <i>Argyrops spinifer</i> (Forsskål)                                                   |                                                    | Off Muscat, Oman Sea                                          |                                              |                                  | Yoon et al. (2013)                              |
| “Paramicrocotyle” sp. FAS-2014                                                                                   | <i>Pinguipes chilensis</i> Valenciennes                                               |                                                    | Off Coquimbo, Chile                                           | KJ794215                                     |                                  | Oliva et al. (2014)                             |
| <i>Paracaesicola nanshaensis</i> Zhou, Li, Liu, Ding & Yuan, 2020 <sup>c</sup>                                   | <i>Paracaesio sordidus</i> Abe & Shinohara                                            |                                                    | Off China                                                     |                                              | MH700264                         | Zhou et al. (2020)                              |
| <i>Pauciconfibula draconis</i> (Briot, 1904) Dillon & Hargis, 1965                                               | <i>Trachinus draco</i> L.                                                             | MNHN<br>HEL1421                                    | Off Algeria                                                   | MW484929                                     |                                  | Azizi et al. (2021)                             |
| <i>Pauciconfibula trachini</i> (Parona & Perugia, 1889) Dillon & Hargis, 1965                                    | <i>Trachinus radiatus</i> Cuvier                                                      | TrraRaml<br>a1Pau1                                 | Off Tunisia                                                   | MW484936                                     |                                  | Azizi et al. (2021)                             |
| <i>Polynemicola</i> sp. SC-2018                                                                                  | na                                                                                    |                                                    | na                                                            |                                              | MH700265                         | Chou (unpublished)                              |
| <i>Polylabris sillaginae</i> (Woolcock, 1936)                                                                    | <i>Sillaginodes punctatus</i> (Cuvier)                                                |                                                    | Off Australia                                                 |                                              | GU289509                         | Catalano et al. (2010)                          |
| <b>Subfamily Prostatomicrocotylinae Yamaguti, 1968</b>                                                           |                                                                                       |                                                    |                                                               |                                              |                                  |                                                 |
| <i>Polylabris halichoeres</i> Wang & Zhang, 1998                                                                 | na                                                                                    |                                                    | na                                                            | JF505509                                     |                                  | Zhang et al. (2011)                             |

|                                                                      |                                                |                                                          |                                                                                                            |                                                          |                                                                 |
|----------------------------------------------------------------------|------------------------------------------------|----------------------------------------------------------|------------------------------------------------------------------------------------------------------------|----------------------------------------------------------|-----------------------------------------------------------------|
| <i>Polylabroides guangdongensis</i> Zhang & Yang, 2000               | na                                             | na                                                       | JQ038230                                                                                                   |                                                          | Zhang et al. (unpublished)                                      |
| <i>Polylabris</i> cf. <i>mamaevi</i> SC-2018                         | na                                             | na                                                       |                                                                                                            | MH700591                                                 | Chou (unpublished)                                              |
| <i>Polylabris</i> sp. SC-2018                                        | na                                             | na                                                       |                                                                                                            | MH700257                                                 |                                                                 |
| <i>Polylabroides</i> sp. SC-2018                                     | na                                             | na                                                       |                                                                                                            | MH700258                                                 |                                                                 |
| <b>Family Capsalidae Baird, 1853</b>                                 |                                                |                                                          |                                                                                                            |                                                          |                                                                 |
| <i>Encotyllabe antofagastensis</i> Sepúlveda, González & Oliva, 2014 | <i>Anisotremus scapularis</i> (Tschudi)        | As1F74<br>As3F135<br>As4F136<br>As2F113<br>As3F134<br>F1 | Off Antofagasta, Chile<br><br><br><br><br>Off Cabo Frio, RJ, Brazil<br>Off Heron Island, QLD,<br>Australia | JQ782836<br>JQ782837<br>JQ782838<br>JQ782839<br>JQ782840 | Sepúlveda et al. (2014)<br><br><br><br><br>MT982166<br>AF026112 |
| <i>Encotyllabe caballeroi</i> Velasquez, 1977                        | <i>Gymnocranius audleyi</i> Ogilby             |                                                          |                                                                                                            |                                                          | Taborda et al. (unpublished)<br>Mollaret et al. (1997)          |
| <i>Encotyllabe caranxi</i> Lebedev, 1967                             | <i>Pseudocaranx dentex</i> (Bloch & Schneider) | AHC<br>29665                                             | Off Australia                                                                                              |                                                          | FJ971990<br>Perkins et al. (2009)                               |
| <i>Encotyllabe cheilodactyli</i> Sepúlveda, González & Oliva, 2014   | <i>Cheilodactylus variegatus</i> Valenciennes  | Cv3F60<br>Cv1F29<br>Cv1F30<br>Cv2F31<br>Cv3F61<br>F29    | Off Antofagasta, Chile                                                                                     | JQ782841<br>JQ782842<br>JQ782843<br>JQ782844<br>JQ782845 | Sepúlveda et al. (2014)                                         |
| <i>Encotyllabe chironemi</i> Robinson, 1961                          | <i>Chironemus marmoratus</i> Günther           |                                                          | Off Cabo Frio, RJ, Brazil<br>Coffs Harbour, Australia                                                      |                                                          | MT982167<br>AF382054<br>Olson & Littlewood (2002)               |
| <i>Encotyllabe</i> cf. <i>spari</i> ACAC-2017                        | <i>Orthopristis ruber</i> (Cuvier)             | E451                                                     | Off Urca, Brazil                                                                                           |                                                          | KY553149<br>Camargo et al. (2017)                               |
| <i>Encotyllabe</i> sp. h FAS-2020                                    |                                                | F44<br>E1.6-E1.9<br>E2.2                                 | Off Cabo Frio, RJ, Brazil                                                                                  |                                                          | MT968927<br>Taborda et al. (unpublished)                        |
| <i>Encotyllabe</i> sp. y FAS-2020                                    | <i>Pagrus pagrus</i> (L.)                      |                                                          |                                                                                                            | MT967362                                                 | MT968928                                                        |

<sup>a</sup>As “*Cynoscionicola branquialis*” (lapsus) (syn. of *C. branchialis*) on GenBank; <sup>b</sup>As “*Microcotylidae* sp. JWJ-2015” on GenBank; <sup>c</sup>As “*Monogenea* gen. n. sp. SC-2018” on GenBank.

## References

- Aiken, H.M., Bott, N.J., Mladineo, I., Montero, F.E., Nowak, B.F. & Hayward, C.J. (2007) Molecular evidence for cosmopolitan distribution of platyhelminth parasites of tunas (*Thunnus* spp.) *Fish & Fisheries*, 8, 167–180.
- Ayadi, Z.E.M., Gey, D., Justine, J.-L. & Tazerouti, F. (2017) A new species of *Microcotyle* (Monogenea: Microcotylidae) from *Scorpaena notata* (Teleostei: Scorpaenidae) in the Mediterranean Sea. *Parasitology International*, 66, 37–42.
- Azizi, R., Bouguerche, C., Santoro, M., Gey, D., Tazerouti, F., Justine, J.-L. & Bahri, S. (2021) Redescription and molecular characterization of two species of Pauciconfibula (Monogenea, Microcotylidae) from trachinid fishes in the Mediterranean Sea. *Parasitology Research*, 120, 2363–2377.
- Badets, M., Whittington, I., Lalubin, F., Allienne, J. F., Maspimby, J.L., Bentz, S., Du Preez, L.H., Barton, D., Hasegawa, H., Tandon, V., Imkongwapang, R., Ohler, A., Combes, C. & Verneau, O. (2011) Correlating early evolution of parasitic platyhelminths to Gondwana breakup. *Systematic Biology*, 60, 762–781.
- Bouguerche, C., Gey, D., Justine, J.-L. & Tazerouti, F. (2019a) Towards the resolution of the *Microcotyle erythrini* species complex: description of *Microcotyle isyebi* n. sp. (Monogenea, Microcotylidae) from *Boops boops* (Teleostei, Sparidae) off the Algerian coast. *Parasitology Research*, 118, 1417–1428.
- Bouguerche, C., Gey, D., Justine, J.-L. & Tazerouti, F. (2019b) *Microcotyle visa* n. sp. (Monogenea: Microcotylidae), a gill parasite of *Pagrus caeruleostictus* (Valenciennes) (Teleostei: Sparidae) off the Algerian coast, Western Mediterranean. *Systematic Parasitology*, 96, 131–147.

- Camargo, A.C.A., Luque, J. L. & Santos, C.P. (2017) *Mexicana rubra* sp. nov. and *Encotyllabe* cf. *spari* Yamaguti, 1934 (Monogenea) of *Orthopristis ruber* (Cuvier, 1830) from the Brazilian Coast off Rio de Janeiro. *Helminthologia*, 54, 336–347.
- Catalano, S.R., Hutson, K.S., Ratcliff, R.M. & Whittington, I.D. (2010) Redescriptions of two species of microcotylid monogeneans from three arripid hosts in southern Australian waters. *Systematic Parasitology*, 76, 211–222.
- Claxton, A.T., Fuehring, A.D., Andres, M.J., Moncrief, T.D. & Curran, S.S. (2017) Parasites of the vermilion snapper, *Rhomboplites aurorubens* (Cuvier), from the Western Atlantic Ocean. *Comparative Parasitology*, 84, 1–14.
- Jovelin, R. & Justine, J.-L. (2001) Phylogenetic relationships within the polyopisthocotylean monogeneans (Platyhelminthes) inferred from partial 28S rDNA sequences. *International Journal for Parasitology*, 31, 393–401.
- Jun, J.W. (2015) Phylogenetic study on *Microcotyle* sp. (Monogenea) from common dentex (*Dentex dentex*) in the Mediterranean Sea, Greece. *African Journal of Biotechnology*, 14, 2532–2538.
- Littlewood, D.T.J., Rohde, K. & Clough, K.A. (1997) Parasite speciation within or between host species? – phylogenetic evidence from site-specific polystome monogeneans. *International Journal for Parasitology*, 27, 1289–1297.
- Littlewood, D.T.J., Rohde, K., Bray, R.A. & Herniou, E.A. (1999) Phylogeny of the Platyhelminthes and the evolution of parasitism. *Biological Journal of the Linnean Society London*, 68, 257–287.
- Mendoza-Franco, E.F., Tun, M.C.R., Anchevida, A.J.D. & Rodriguez, R.E.R. (2018) Morphological and molecular (28S rRNA) data of monogeneans (Platyhelminthes) infecting the gill lamellae of marine fishes in the Campeche Bank, southwest Gulf of Mexico. *ZooKeys*, 783, 125–161.
- Mladineo, I., Šegvić, T. & Grubišić, L. (2009). Molecular evidence for the lack of transmission of the monogenean *Sparicotyle chrysophrii* (Monogenea, Polyopisthocotylea) and isopod *Ceratothoa oestroides* (Crustacea, Cymothoidae) between wild bogue (*Boops boops*) and cage-reared sea bream (*Sparus aurata*) and sea bass (*Dicentrarchus labrax*). *Aquaculture*, 295, 160–167.
- Mollaret, I., Jamieson, B.G., Adlard, R.D., Hugall, A., Lecointre, G., Chombard, C. & Justine, J.-L. (1997) Phylogenetic analysis of the Monogenea and their relationships with Digenea and Eucestoda inferred from 28S rDNA sequences. *Molecular & Biochemical Parasitology*, 90, 433–438.
- Oliva, M.E., Sepulveda, F.A. & Gonzalez, M.T. (2014) *Parapedocotyle prolatili* gen. n. et sp. n., a representative of a new subfamily of the Dicliphoridae (Monogenea), a gill parasite of *Prolatilus jugularis* (Teleostei: Pinguipedidae) from Chile. *Folia Parasitologica*, 61, 543–548.
- Olson, P.D. & Littlewood, D.T.J. (2002) Phylogenetics of the Monogenea - evidence from a medley of molecules. *International Journal for Parasitology*, 32, 233–244.
- Ono, N., Matsumoto, R., Nitta, M. & Kamio, Y. (2020) Taxonomic revision of *Microcotyle caudata* Goto, 1894 parasitic on gills of seabass (Scorpaeniformes: Sebastidae), with a description of *Microcotyle kasago* n. sp. (Monogenea: Microcotylidae) from off Japan. *Systematic Parasitology*, 97, 501–516.
- Park, J.K., Kim, K.H., Kang, S., Kim, W., Eom, K.S. & Littlewood, D.T.J. (2007) A common origin of complex life cycles in parasitic flatworms: evidence from the complete mitochondrial genome of *Microcotyle sebastis* (Monogenea: Platyhelminthes). *BMC Evolutionary Biology*, 7, 11.
- Perkins, E.M., Donnellan, S.C., Bertozzi, T., Chisholm, L.A. & Whittington, I.D. (2009) Looks can deceive: molecular phylogeny of a family of flatworm ectoparasites (Monogenea: Capsalidae) does not reflect current morphological classification. *Molecular Phylogenetics & Evolution*, 52, 705–714.
- Sepúlveda, F.A., Gonzalez, M.T. & Oliva, M.E. (2014) Two new species of *Encotyllabe* (Monogenea: Capsalidae) based on morphometric and molecular evidence: parasites of two inshore fish species of northern Chile. *Journal of Parasitology*, 100, 344–349.
- Villora-Montero, M., Pérez-del-Olmo, A., Georgieva, S., Raga, J.A. & Montero, F.E. (2020) Considerations on the taxonomy and morphology of *Microcotyle* spp.: redescription of *M. erythrini* van Beneden & Hesse, 1863 (*sensu stricto*) (Monogenea: Microcotylidae) and the description of a new species from *Dentex dentex* (L.) (Teleostei: Sparidae). *Parasites & Vectors*, 13, 45.
- Yoon, G.H., Al-Jufaili, S., Freeman, M.A., Bron, J.E., Paladini, G. & Shinn, A.P. (2013) *Omanicotyle heterospina* n. gen. et n. comb. (Monogenea: Microcotylidae) from the gills of *Argyrops spinifer* (Forsskal) (Teleostei: Sparidae) from the Sea of Oman. *Parasites & Vectors*, 6, 170.
- Zhang, J., Wu, X., Xie, M., Xu, X., & Li, A. (2011) The mitochondrial genome of *Polylabris halichoeres* (Monogenea: Microcotylidae). *Mitochondrial DNA*, 22, 3–5.
- Zhou, Z.-H., Li, Y.-Z., Lui, L., Ding, X.-J. & Yuan, K. (2020) *Paracaesicola nanshaensis* n. gen., n. sp. (Monogenea, Microcotylidae) a gill parasite of *Paracaesio sordida* (Teleostei, Lutjanidae) from the South China Sea. *Parasite* 27, 33.
