# Supplementary material for: Novel molecular data for monogenean parasites of sparid fishes in the Mediterranean and a molecular phylogeny of the Microcotylidae Taschenberg, 1879
Source: PubMed Central journal article supplement (PMC9795350; doi:10.1016/j.crpvbd.2021.100069), 2021-12-24
Supplement: mmc2.pdf [file mmc2.pdf]

**Supplementary Table S2.** Haplotypes of *Sparicotyle chrysophrii*

| Host                 | Isolate              | GenBank ID | Haplotype | Reference              |    |                          |
|----------------------|----------------------|------------|-----------|------------------------|----|--------------------------|
| <i>Sparus aurata</i> | L5                   | GQ240237   | H1        | Mladineo et al. (2009) |    |                          |
|                      | L7                   | GQ240239   | H1        |                        |    |                          |
|                      | L1                   | GQ240240   | H1        |                        |    |                          |
|                      | L2                   | GQ240241   | H1        |                        |    |                          |
|                      | L3                   | GQ240242   | H1        |                        |    |                          |
|                      | L8                   | GQ240243   | H1        |                        |    |                          |
|                      | L9                   | GQ240244   | H1        |                        |    |                          |
|                      | M14                  | GQ240249   | H1        |                        |    |                          |
|                      | L10                  | GQ240245   | H1        |                        |    |                          |
|                      | M16                  | GQ240255   | H1        |                        |    |                          |
|                      | M13                  | GQ240254   | H1        |                        |    |                          |
|                      | <i>Boops boops</i>   | M18        | GQ240256  |                        | H2 |                          |
|                      |                      | M19        | GQ240257  |                        | H2 |                          |
|                      |                      | M20        | GQ240258  |                        | H2 |                          |
| M21                  |                      | GQ240259   | H2        |                        |    |                          |
| M22                  |                      | GQ240260   | H2        |                        |    |                          |
| L23                  |                      | GQ240261   | H2        |                        |    |                          |
| L24                  |                      | GQ240262   | H2        |                        |    |                          |
| L25                  |                      | GQ240263   | H2        |                        |    |                          |
| L26                  |                      | GQ240264   | H2        |                        |    |                          |
| L27                  |                      | GQ240265   | H2        |                        |    |                          |
| <i>Sparus aurata</i> | L4                   | GQ240236   | H3        |                        |    |                          |
|                      | L6                   | GQ240238   | H3        |                        |    |                          |
|                      | M15                  | GQ240250   | H3        |                        |    |                          |
|                      | M8                   | GQ240246   | H4        |                        |    |                          |
|                      | M7                   | GQ240251   | H4        |                        |    |                          |
|                      | M10                  | GQ240248   | H5        |                        |    |                          |
|                      | M12                  | GQ240253   | H5        |                        |    |                          |
|                      | M9                   | GQ240247   | H6        |                        |    |                          |
|                      | M11                  | GQ240252   | H6        |                        |    |                          |
|                      | <i>Sparus aurata</i> | JJ         | AY009161  |                        | H7 | Jovelin & Justine (2001) |
|                      | <i>Sparus aurata</i> | MR 82      | OL675207  |                        | H8 | Present study            |
| MR 79                |                      | OL675206   | H9        |                        |    |                          |
| MR 51                |                      | OL675208   | H10       |                        |    |                          |
| MR 57                |                      | OL675210   | H11       |                        |    |                          |
| MR 69                |                      | OL675209   | H12       |                        |    |                          |

**References**

- Jovelin, R. & Justine, J.-L. (2001) Phylogenetic relationships within the polyopisthocotylean monogeneans (Platyhelminthes) inferred from partial 28S rDNA sequences *International Journal for Parasitology*, 31, 393–401.
- Mladineo, I., Šegvić, T. & Grubišić, L. (2009) Molecular evidence for the lack of transmission of the monogenean *Sparicotyle chrysophrii* (Monogenea, Polyopisthocotylea) and isopod *Ceratothoa oestroides* (Crustacea, Cymothoidae) between wild bogue (*Boops boops*) and cage-reared sea bream (*Sparus aurata*) and sea bass (*Dicentrarchus labrax*). *Aquaculture*, 295, 160–167.
